# Supplementary material for: FESOM-C: coastal dynamics on hybrid unstructured meshes
Source: Copernicus journal article supplement (doi:10.5194/gmd-2018-112), 2018-07-25
Supplement: Supplementary file [file gmd-2018-112-AC3-supplement.pdf]

Manuscript Number: **gmd-2018-112**

Article Title: **FESOM-C v.2: coastal dynamics on hybrid unstructured meshes.**

GMD

Dear Editor,

Thank you for the opportunity to answer to the issues raised by the Executive editor of GMD.

**Executive editor of GMD:**

**"The main paper must give the model name and version number (or other unique identifier) in the title."**

**"All papers must include a section, at the end of the paper, entitled 'Code availability'. Here, either instructions for obtaining the code, or the reasons why the code is not available should be clearly stated. It is preferred for the code to be uploaded as a supplement or to be made available at a data repository with an associated DOI (digital object identifier) for the exact model version described in the paper. Alternatively, for established models, there may be an existing means of accessing the code through a particular system. In this case, there must exist a means of permanently accessing the precise model version described in the paper. In some cases, authors may prefer to put models on their own website, or to act as a point of contact for obtaining the code. Given the impermanence of websites and email addresses, this is not encouraged, and authors should consider improving the availability with a more permanent arrangement. After the paper is accepted the model archive should be updated to include a link to the GMD paper."**

*Answer: We have put the code described in the manuscript to the permanent data archive Zenodo with an open access, the DOI is **<https://doi.org/10.5281/zenodo.2085177>**. The full model name and version number were added to the caption of the manuscript and to the code description at the Zenodo portal.*
